# Supplementary material
Source: PubMed Central journal article supplement (PMC6926450)
Supplement: supp_RA119.011350_156269_1_supp_424586_q0sk0s.pdf [file supp_RA119.011350_156269_1_supp_424586_q0sk0s.pdf]

## **SUPPORTING INFORMATION**

### **Cell-free transcription in *Xenopus* egg extract**

John K. Barrows<sup>1</sup> and David T. Long<sup>1\*</sup>

From the <sup>1</sup>Department of Biochemistry and Molecular Biology,  
Medical University of South Carolina, Charleston, SC, USA.

\*To whom correspondence should be addressed: David T. Long, [longdt@musc.edu](mailto:longdt@musc.edu)

## Figure S1

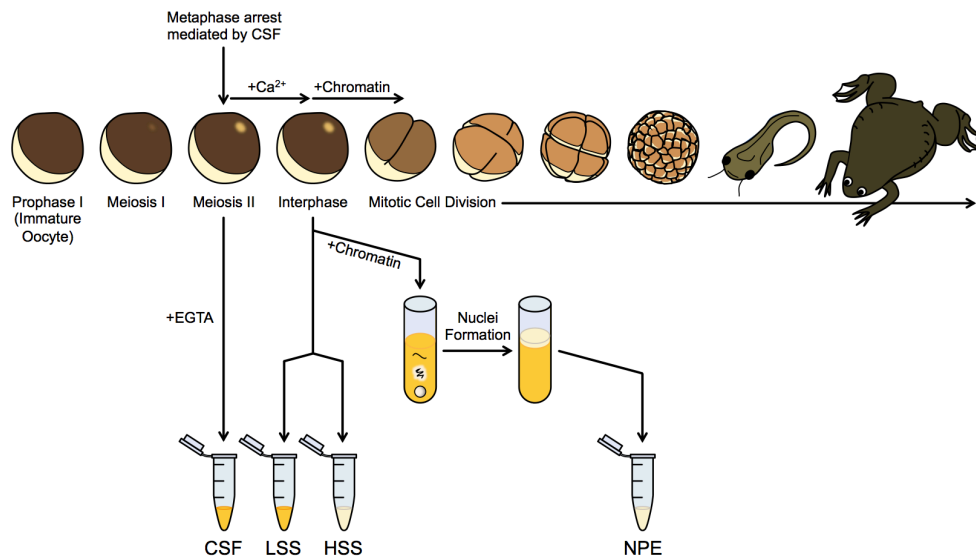

**Figure S1.** Schematic showing *Xenopus laevis* egg extracts prepared at different developmental stages. “Traditional” extracts are produced with mature, unfertilized *Xenopus* eggs. These eggs can be driven to interphase by the addition of exogenous calcium ( $\text{Ca}^{2+}$ ), which mimics the release of calcium generated during fertilization (1). Some extracts derived from interphase-arrested eggs can promote chromatin decondensation and nuclear formation (2). Although nuclear formation assays support RNA polymerase III activity (involved in tRNA synthesis) (3), they do not promote mRNA transcription by RNA polymerase II (4). Unfertilized eggs can also be lysed in the presence of a calcium chelator (EGTA) to induce a mitotic state (5). Extracts made from mitotic eggs can be incubated with chromatin to promote spindle assembly (6). Spindle assembly is dependent on RNAPII-dependent centromeric transcription, but does not involve widespread transcription of the genome (7,8). Extracts have also been produced with immature oocytes isolated from frog ovaries (arrested in prophase I). Although these extracts retain some level of transcriptional activity, they lack robust chromatin assembly that is required for regulated transcription and pre-mRNA processing (9,10). CSF (cytostatic factor-arrested extract), LSS (low-speed supernatant of interphase eggs), HSS (high-speed supernatant of interphase eggs), NPE (nucleoplasmic extract).

Figure S2

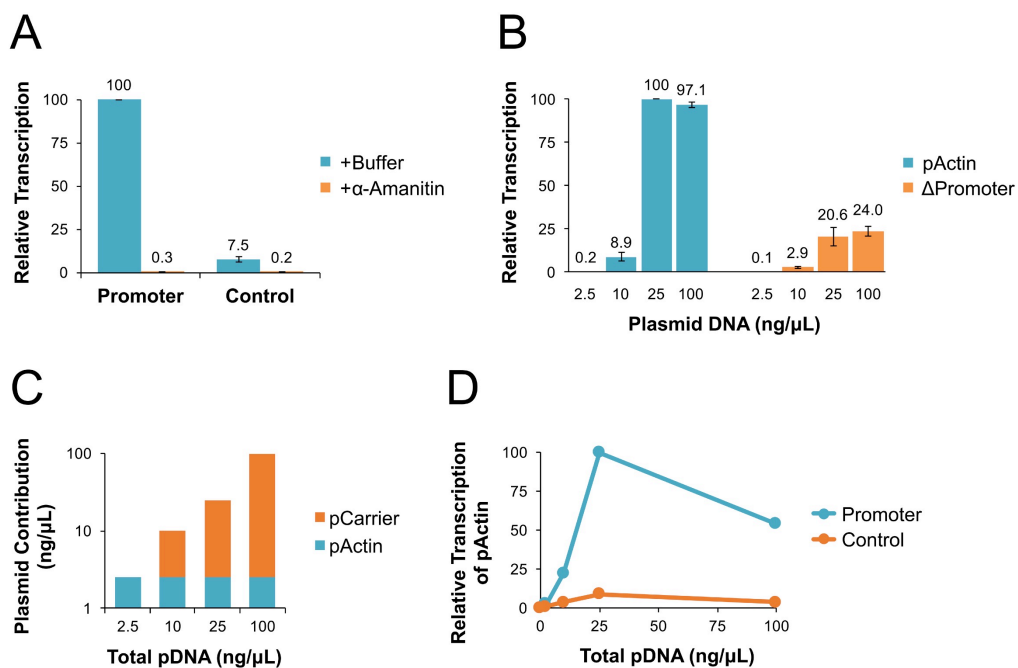

**Figure S2.** (A) Experimental replicates of Figure 2B are shown for transcription of pActin in NPE using Promoter and Control primers at 60 minutes (n=4). (B) Experimental replicates of Figure 2C (n=3). Data labels show average relative transcription and error bars represent +/- one standard deviation. (C) Schematic graph showing the amount of pActin and pCarrier included in each reaction depicted in (D). (D) NPE was incubated with a fixed 2.5 ng/ $\mu$ L of pActin and increasing amounts of pCarrier for 120 minutes. RNA was then isolated and quantified by RT-qPCR using the Promoter and Control primers.

## Figure S3

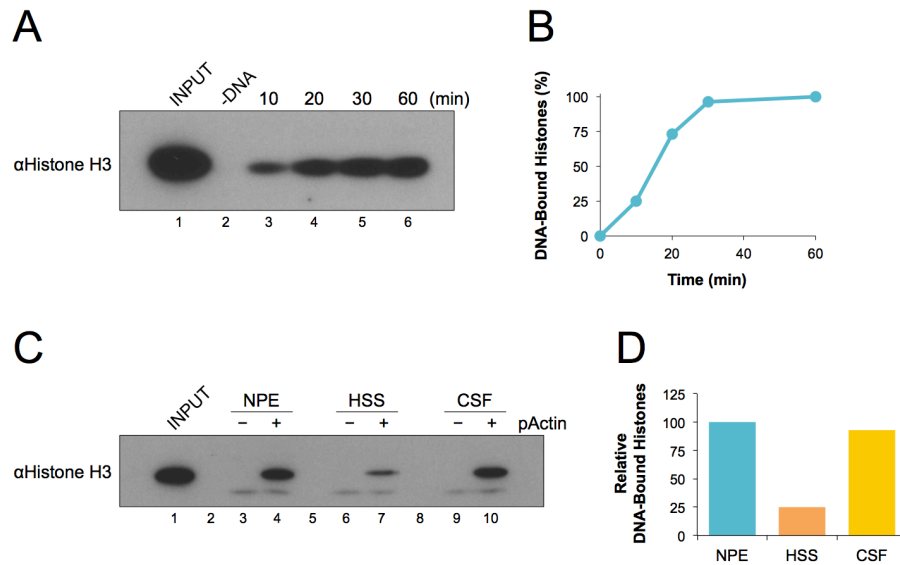

**Figure S3. Chromatinization of plasmid DNA in NPE.** (A) pActin was incubated at 10 ng/ $\mu$ L in NPE. At the indicated time, DNA-bound proteins were isolated by plasmid pull-down and analyzed by Western blot with histone H3 antibodies. (B) DNA-bound histone H3 from (A) was quantified and graphed relative to peak intensity. (C) pActin was incubated at 10 ng/ $\mu$ L in NPE, HSS, or CSF for 60 minutes and DNA-bound histone H3 was visualized as described in (A). (D) DNA-bound histone H3 from (C) was quantified and graphed relative to binding in NPE.

Figure S4

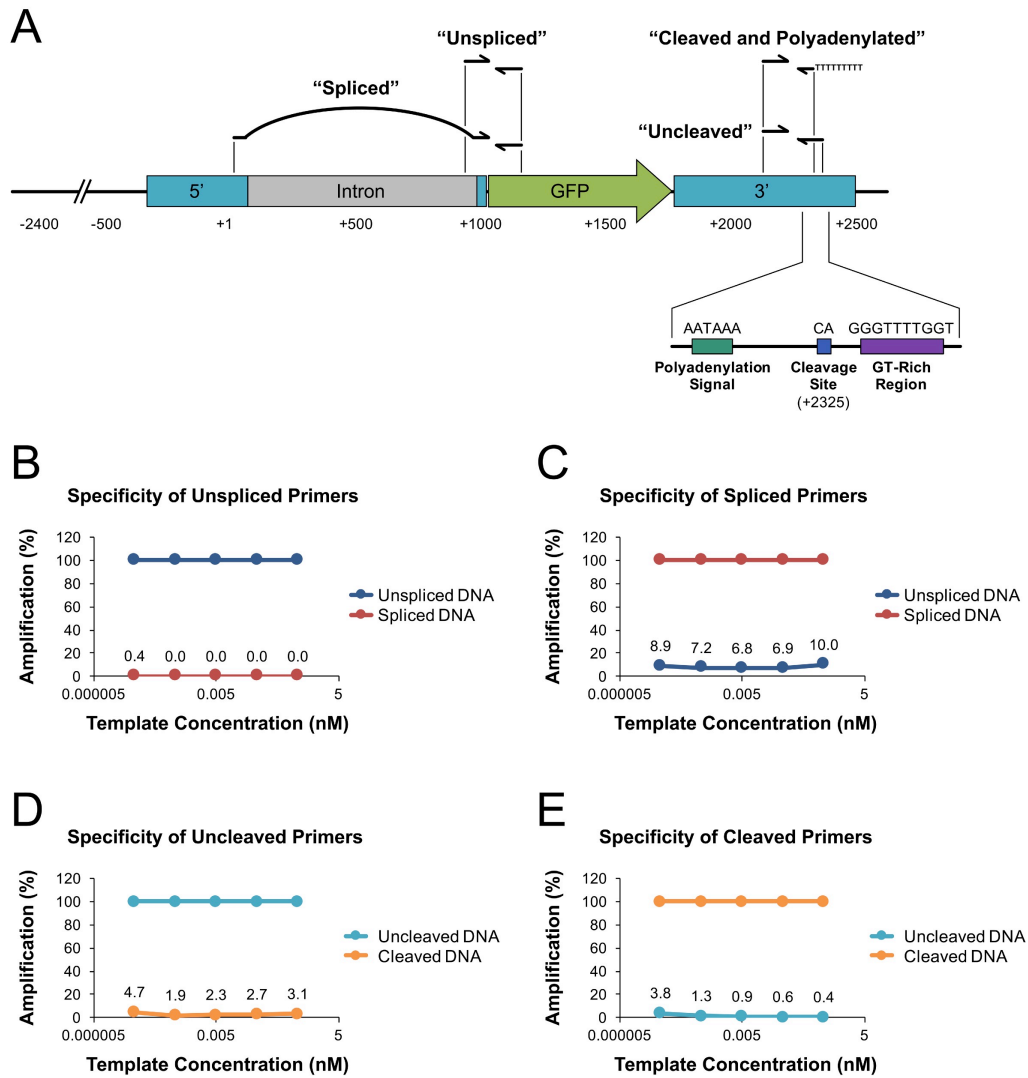

**Figure S4. Specificity of pre-mRNA processing primers.** (A) pActin schematic showing the relative positions of Unspliced, Spliced, Uncleaved, and Cleaved and Polyadenylated primer pairs. (B-E) The specificity of each primer pair was analyzed by qPCR with the corresponding unprocessed and processed DNA templates. “Background” amplification of the incorrect DNA template was graphed as a percentage of total amplification measured with the correct DNA template.

## REFERENCES

1. Gillespie, P. J., Gambus, A., and Blow, J. J. (2012) Preparation and use of *Xenopus* egg extracts to study DNA replication and chromatin associated proteins. *Methods (San Diego, Calif.)* **57**, 203-213
2. Blow, J. J., and Laskey, R. A. (1986) Initiation of DNA replication in nuclei and purified DNA by a cell-free extract of *Xenopus* eggs. *Cell* **47**, 577-587
3. Ullman, K. S., and Forbes, D. J. (1995) RNA polymerase III transcription in synthetic nuclei assembled in vitro from defined DNA templates. *Mol Cell Biol* **15**, 4873-4883
4. Crowe, A. J., and Barton, M. C. (1999) Functional analysis of chromatin assembled in synthetic nuclei. *Methods (San Diego, Calif.)* **17**, 173-187
5. Lohka, M. J., and Masui, Y. (1984) Effects of Ca<sup>2+</sup> ions on the formation of metaphase chromosomes and sperm pronuclei in cell-free preparations from unactivated *Rana pipiens* eggs. *Developmental biology* **103**, 434-442
6. Desai, A., Murray, A., Mitchison, T. J., and Walczak, C. E. (1999) The use of *Xenopus* egg extracts to study mitotic spindle assembly and function in vitro. *Methods in cell biology* **61**, 385-412
7. Grenfell, A. W., Heald, R., and Strzelecka, M. (2016) Mitotic noncoding RNA processing promotes kinetochore and spindle assembly in *Xenopus*. *The Journal of cell biology* **214**, 133-141
8. Blower, M. D. (2016) Centromeric Transcription Regulates Aurora-B Localization and Activation. *Cell reports* **15**, 1624-1633
9. Wang, W. L., and Shechter, D. (2016) Chromatin assembly and transcriptional cross-talk in *Xenopus laevis* oocyte and egg extracts. *Int J Dev Biol* **60**, 315-320
10. Jimeno-González, S., and Reyes, J. C. (2016) Chromatin structure and pre-mRNA processing work together. *Transcription* **7**, 63-68
